# Supplementary material
Source: HighWire-hosted journal article supplement (https://ez-admanager.com/highwire/filestream/165003/field_highwire_adjunct_files/0/cumming_2254.pdf)
Supplement: cumming_2254.pdf [file cumming_2254.pdf]

# パーキンソニズム患者における早期の体重減少により 転帰不良が予測される 新規発症コホート研究のエビデンス

Early weight loss in parkinsonism predicts poor outcomes  
Evidence from an incident cohort study

**目的：**パーキンソン病 (PD) 患者、非定型パーキンソニズム患者、マッチングした対照被験者において、体重の経時的変化を比較した。また、パーキンソニズム患者の体重減少に影響を及ぼすベースライン時の因子を特定し、体重減少により転帰不良が予測されるか否かを検討する。

**方法：**Parkinsonism Incidence in North-East Scotland (PINE) 研究のデータを解析した。PINE研究では、地域住民に基づく新規発症パーキンソニズム患者の前向きコホートと年齢および性別をマッチさせた対照被験者を対象とし、年1回の追跡調査を実施した。混合モデル解析において、PD患者、非定型パーキンソニズム患者、対照被験者の体重減少を検討した。臨床的意義のある持続的な体重減少（ベースライン時から5%超の減少）のベースライン時における決定因子と、パーキンソニズムにおける早期の持続的な体重減少と死亡、認知症、要支援状態との間の関連性を、Cox回帰分析で検討した。

**結果：**計515例（対照被験者240例、PD患者187例、非定型パーキンソニズム患者88例）を対象とし、追跡調査期間の中央値は5年であった。診断時において、非定型パーキンソニズム患者はPD患者より体重が軽く、PD患者は対照被験者より体重が軽かった。PD患者の体重減少は対照被験者より迅速であり、非定型パーキンソニズム患者で体重減少が最も迅速であった。潜在的な交絡因子に関する多変量補正後、年齢のみに臨床的意義のある持続的な体重減少と独立した関連が認められた [年齢10歳の増加に関するハザード比 (HR) : 1.83, 95% 信頼区間 (CI) : 1.44~2.32]。診断後1年以内に起こる体重減少は、要支援 (HR : 2.11, 95% CI : 1.00~4.42)、認知症 (HR : 3.23, 95% CI : 1.40~7.44)、死亡 (HR : 2.23, 95% CI : 1.46~3.41) のリスク上昇と独立した関連を示した。

**結論：**体重減少は早期パーキンソニズム患者に認められ、PDより非定型パーキンソニズムにおいて顕著である。パーキンソニズムにおける早期の体重減少は予後の観点から重要であり、予防を目的とした標的を絞った食事介入により、長期的な転帰が改善される可能性がある。

Neurology® 2017; 89: 2254-2261

図2 対照被験者、PD患者、非定型パーキンソニズム患者の体重の経時的変化

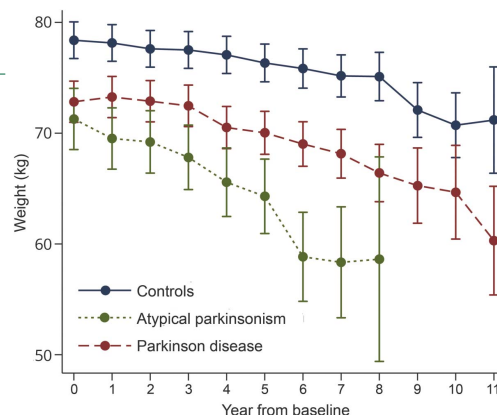

対照被験者、特発性PD患者、非定型パーキンソニズム患者のベースライン時（患者の診断時および対照被験者の登録時）およびそれ以降における補正後の毎年の推定平均体重 (kg)。バーは各データ点における95%信頼区間を示す。PD=パーキンソン病。

Kirsten Cumming,  
MBChB\*;  
Angus D. Macleod, PhD;  
Phyo K. Myint, MD;  
Carl E. Counsell, MD

\*School of Medicine,  
Medical Sciences &  
Nutrition, Institute of  
Applied Health Sciences,  
University of Aberdeen,  
Scotland

Correspondence to  
Dr. Macleod:  
Angus.Macleod@abdn.ac.uk

表1 体重減少の有無(体重減少なし, 診断後1年以内の持続的な体重減少, 追跡調査中のあらゆる時点の持続的な体重減少)別の対照被験者およびパーキンソンズ病患者のベースライン時背景

| Baseline variable                 | Controls (n = 240) |                  |                | IPD (n = 187) |               |                  |                 | Atypical parkinsonian syndromes (n = 88) |                 |                  |                  |                 |
|-----------------------------------|--------------------|------------------|----------------|---------------|---------------|------------------|-----------------|------------------------------------------|-----------------|------------------|------------------|-----------------|
|                                   | No WL              | WL in first year | WL at any time | All controls  | No WL         | WL in first year | WL at any time  | All IPD                                  | No WL           | WL in first year | WL at any time   | All APS         |
| No. (%)                           | 156 (65)           | 18 (8)           | 84 (35)        | 240           | 114 (61)      | 15 (8)           | 73 (39)         | 187                                      | 48 (55)         | 19 (22)          | 40 (45)          | 88              |
| Age, y <sup>a</sup>               | 73.6 (±9.3)        | 74.8 (±11.0)     | 76.7 (±8.2)    | 74.7 (±9.1)   | 69.7 (±11.3)  | 76.5 (±8.0)      | 75.1 (±7.8)     | 71.8 (±10.4)                             | 77.0 (±6.8)     | 79.5 (±8.0)      | 78.8 (±7.8)      | 77.8 (±7.3)     |
| Female, n (%)                     | 55 (35)            | 6 (33)           | 37 (44)        | 92 (38)       | 46 (40)       | 6 (40)           | 32 (44)         | 78 (42)                                  | 17 (35)         | 10 (53)          | 16 (40)          | 33 (38)         |
| Weight, kg                        | 77.6 (±13.0)       | 84.3 (±18.5)     | 76.6 (±16.4)   | 77.3 (±14.3)  | 73 (±13.9)    | 69.9 (±13.4)     | 71.8 (±13.4)    | 72.5 (±13.7)                             | 67 (±12.8)      | 65.4 (±14.2)     | 69.03 (±14.7)    | 68 (±13.7)      |
| Charlson score <sup>b</sup>       | 1 (0-3)            | 2 (0-3)          | 2 (1-3)        | 1 (0-3)       | 1 (0-2)       | 1 (0-3)          | 1 (0-2)         | 1 (0-2)                                  | 1 (0-2)         | 1 (1-2)          | 1 (0-1)          | 1 (0-2)         |
| Memory symptoms, c n (%)          | 11 (7)             | 1 (6)            | 9 (11)         | 20 (8)        | 18 (16)       | 5 (33)           | 13 (18)         | 31 (17)                                  | 25 (52)         | 13 (68)          | 23 (58)          | 48 (55)         |
| Hallucinations, c n (%)           | 0 (0)              | 0 (0)            | 0 (0)          | 0 (0)         | 2 (12)        | 0 (0)            | 3 (4)           | 5 (3)                                    | 4 (8)           | 3 (16)           | 6 (15)           | 10 (11)         |
| Low mood, c n (%)                 | 8 (5)              | 6 (33)           | 4 (5)          | 20 (8)        | 20 (18)       | 4 (27)           | 18 (25)         | 38 (20)                                  | 12 (25)         | 6 (32)           | 10 (25)          | 22 (25)         |
| Dysphagia, c n (%)                | 2 (1)              | 0 (0)            | 4 (5)          | 6 (3)         | 23 (20)       | 5 (33)           | 12 (16)         | 35 (19)                                  | 11 (23)         | 4 (21)           | 8 (20)           | 19 (22)         |
| Dependency, n (%)                 | 5 (3)              | 3 (17)           | 8 (10)         | 20 (8)        | 19 (17)       | 4 (27)           | 18 (25)         | 37 (20)                                  | 26 (54)         | 13 (68)          | 21 (53)          | 47 (53)         |
| Dementia, n (%)                   | 0 (0)              | 0 (0)            | 0 (0)          | 0 (0)         | 0 (0)         | 1 (7)            | 1 (1)           | 1 (1)                                    | 23 (48)         | 12 (63)          | 19 (48)          | 42 (48)         |
| MMSE score <sup>b</sup>           | 29 (28-30)         | 29 (28-30)       | 29 (28-30)     | 29 (28-30)    | 29 (27-30)    | 28 (27-29)       | 28 (27-29)      | 29 (27-30)                               | 25 (20-27)      | 23 (19-27)       | 25 (21-28.5)     | 25 (20-28)      |
| UPDRS part I score <sup>b</sup>   | 0 (0-0)            | 0 (0-0)          | 0 (0-0)        | 0 (0-2)       | 1 (0-2)       | 2 (1-3)          | 2 (1-3)         | 1 (0-2)                                  | 2 (1-3)         | 3 (1-5)          | 2 (1-5)          | 2 (1-3)         |
| UPDRS part II score <sup>b</sup>  | 0 (0-0)            | 0 (0-0)          | 0 (0-0)        | 0 (0-0)       | 9.5 (6-14)    | 10 (6-16)        | 10.5 (6-14.5)   | 10 (6-14)                                | 12.5 (7-19.5)   | 13 (7-17)        | 10 (7-17)        | 11 (7-18)       |
| UPDRS part III score <sup>b</sup> | 2 (0-4)            | 2 (1-5)          | 3 (1-6)        | 2 (0-5)       | 23.5 (16-32)  | 30 (14-34)       | 26 (18-32)      | 24 (16-32)                               | 30 (23.5-41)    | 31 (19-39)       | 25.5 (17.8-34.5) | 29 (21-39)      |
| Hoehn-Yahr stage <sup>b</sup>     | —                  | —                | —              | —             | 2.5 (1.5-2.5) | 2.5 (1.5-2.5)    | 2.5 (2-3)       | 2.5 (2-3)                                | 3 (2.5-3)       | 3 (2.5-4)        | 2.5 (2.25-4)     | 2.75 (2.5-3.8)  |
| PDQ-8 <sup>b</sup>                | —                  | —                | —              | —             | 15.6 (6.3-25) | 10.9 (6.3-25)    | 12.5 (6.3-28.1) | 15.6 (6.3-25)                            | 15.6 (6.3-31.3) | 28.1 (14.0-34.4) | 21.9 (9.4-31.3)  | 17.2 (9.4-31.3) |
| Barthel Index <sup>b</sup>        | 20 (20-20)         | 20 (18.5-20)     | 20 (19-20)     | 20 (20-20)    | 20 (19-20)    | 20 (20-20)       | 20 (18-20)      | 20 (19-20)                               | 18.5 (13-20)    | 17.5 (12.5-19)   | 19 (16.5-20)     | 19 (14-20)      |

略語: APS=非定型パーキンソン症候群, IPD=特発性パーキンソン病, MMSE=Mini-Mental State Examination, PD=パーキンソン病, PDQ-8=Parkinson's Disease Questionnaire-8, UPDRS=Unified Parkinson's Disease Rating Scale, WL=体重減少。  
<sup>a</sup>平均(±SD), <sup>b</sup>中央値(IQR), <sup>c</sup>自己申告。

表2 パーキンソンズ病患者における体重減少までの期間と選択した転帰までの期間に関する多変量Cox回帰モデル

| Baseline variable                                      | Determinants             |                        |                     | Time to outcomes     |                        |                     |                    |                        |                    |                   |                        |                     |
|--------------------------------------------------------|--------------------------|------------------------|---------------------|----------------------|------------------------|---------------------|--------------------|------------------------|--------------------|-------------------|------------------------|---------------------|
|                                                        | Time to >5% WL (n = 275) |                        |                     | Dependency (n = 139) |                        |                     | Dementia (n = 220) |                        |                    | Death (n = 258)   |                        |                     |
|                                                        | HR                       | 95% CI                 | p Value             | HR                   | 95% CI                 | p Value             | HR                 | 95% CI                 | p-value            | HR                | 95% CI                 | p Value             |
| Sustained clinically significant weight loss in year 1 |                          |                        |                     | 2.11 <sup>a</sup>    | 1.00-4.42 <sup>a</sup> | 0.05 <sup>a</sup>   | 3.23 <sup>a</sup>  | 1.40-7.44 <sup>a</sup> | 0.006 <sup>a</sup> | 2.23 <sup>a</sup> | 1.46-3.41 <sup>a</sup> | <0.001 <sup>a</sup> |
| Atypical parkinsonism (vs PD)                          | 1.44 <sup>a</sup>        | 0.95-2.18 <sup>a</sup> | 0.09 <sup>a</sup>   | 2.30 <sup>a</sup>    | 1.30-4.08 <sup>a</sup> | 0.004 <sup>a</sup>  | 1.05               | 0.47-2.32              | 0.91               | 2.43 <sup>a</sup> | 1.70-3.49 <sup>a</sup> | <0.001 <sup>a</sup> |
| Age (10-y increase)                                    | 1.83 <sup>a</sup>        | 1.44-2.32 <sup>a</sup> | <0.001 <sup>a</sup> | 1.42                 | 1.09-1.86              | 0.01                | 1.64 <sup>a</sup>  | 1.12-2.41 <sup>a</sup> | 0.01 <sup>a</sup>  | 1.87 <sup>a</sup> | 1.49-2.34 <sup>a</sup> | <0.001 <sup>a</sup> |
| Male sex                                               | 0.96                     | 0.66-1.41              | 0.87                | 1.29                 | 0.84-2.00              | 0.36                | 1.01               | 0.56-1.81              | 0.52               | 1.40 <sup>a</sup> | 1.00-1.96 <sup>a</sup> | 0.05 <sup>a</sup>   |
| Charlson score                                         | 1.06                     | 0.93-1.20              | 0.41                | 1.07                 | 0.93-1.24              | 0.34                | 1.03               | 0.86-1.23              | 0.86               | 1.10 <sup>a</sup> | 0.99-1.22 <sup>a</sup> | 0.07 <sup>a</sup>   |
| Memory symptoms                                        | 1.07                     | 0.70-1.66              | 0.75                | 2.09 <sup>a</sup>    | 1.25-3.50 <sup>a</sup> | 0.005 <sup>a</sup>  | 2.58               | 1.36-4.91              | 0.004              | 1.16              | 0.81-1.67              | 0.42                |
| Hallucinations                                         | 1.58                     | 0.79-3.19              | 0.20                | 2.59                 | 0.81-8.31              | 0.11                | 0.23               | 0.03-2.34              | 0.25               | 0.83              | 0.46-1.51              | 0.55                |
| Low mood                                               | 1.43                     | 0.91-2.26              | 0.13                | 1.08                 | 0.61-1.92              | 0.79                | 1.09               | 0.57-2.08              | 0.80               | 1.27              | 0.85-1.89              | 0.25                |
| Dysphagia                                              | 0.98                     | 0.60-1.60              | 0.94                | 1.36                 | 0.76-2.43              | 0.30                | 0.42               | 0.19-0.95              | 0.04               | 1.06              | 0.72-1.57              | 0.76                |
| Dependency                                             | 1.13                     | 0.73-1.76              | 0.57                |                      |                        |                     | 1.45               | 0.67-3.12              | 0.34               | 2.00 <sup>a</sup> | 1.39-2.88 <sup>a</sup> | <0.001 <sup>a</sup> |
| Dementia                                               | 1.33                     | 0.72-2.47              | 0.36                | 3.06                 | 0.97-9.67              | 0.06                |                    |                        |                    | 1.44              | 0.91-2.27              | 0.12                |
| MMSE                                                   | 1.02                     | 0.96-1.09              | 0.44                | 0.93                 | 0.82-1.05              | 0.26                | 0.90 <sup>a</sup>  | 0.83-0.97 <sup>a</sup> | 0.005 <sup>a</sup> | 0.99              | 0.94-1.03              | 0.59                |
| UPDRS part I                                           | 1.02                     | 0.93-1.12              | 0.63                | 1.20                 | 1.01-1.42              | 0.04                | 1.28 <sup>a</sup>  | 1.05-1.56 <sup>a</sup> | 0.01 <sup>a</sup>  | 1.05              | 0.97-1.14              | 0.22                |
| UPDRS part II                                          | 0.99                     | 0.96-1.02              | 0.56                | 1.04                 | 0.97-1.10              | 0.28                | 0.98               | 0.93-1.03              | 0.18               | 0.99              | 0.96-1.02              | 0.48                |
| UPDRS part III                                         | 1.00                     | 0.98-1.01              | 0.62                | 1.06 <sup>a</sup>    | 1.04-1.98 <sup>a</sup> | <0.001 <sup>a</sup> | 1.02               | 0.99-1.04              | 0.20               | 1.01              | 0.99-1.03              | 0.25                |
| Hoehn-Yahr stage                                       | 0.93                     | 0.74-1.17              | 0.55                | 0.81                 | 0.51-1.28              | 0.36                | 0.99               | 0.63-1.54              | 0.95               | 1.12              | 0.89-1.40              | 0.34                |
| Barthel Index                                          | 1.09                     | 1.00-1.19              | 0.04                | 0.79                 | 0.58-1.05              | 0.11                | 1.13               | 1.02-1.27              | 0.03               | 1.05              | 0.98-1.12              | 0.15                |
| PDQ-8                                                  | 1.00                     | 0.99-1.02              | 0.89                | 0.99                 | 0.97-1.01              | 0.32                | 0.98               | 0.95-1.00              | 0.07               | 0.99              | 0.98-1.01              | 0.23                |

略語: CI=信頼区間, HR=ハザード比, MMSE=Mini-Mental State Examination, PDQ-8=Parkinson's Disease Questionnaire-8, UPDRS=Unified Parkinson's Disease Rating Scale, WL=体重減少。

<sup>a</sup>ハザード比は各モデルの最終段階の変数を示す。他の変数は、最終モデルの変数で補正して示している。
